# Supplementary material for: Quality Indicators during Delivery and the Immediate Postpartum Period: A Modified Delphi Study
Source: MDPI journal article supplement (doi:10.3390/healthcare11060848), 2023-03-13
Supplement: s1 [file s1]

**Supplementary Table S1.** Quality indicators (numerator and denominator) and definitions that were not accepted after both rounds of the Delphi survey.

| Category                                                                                               | Quality indicators <sup>1</sup> or Definitions                  | Numerator                                                                                                                                                                                                                                                     | Denominator                                               |
|--------------------------------------------------------------------------------------------------------|-----------------------------------------------------------------|---------------------------------------------------------------------------------------------------------------------------------------------------------------------------------------------------------------------------------------------------------------|-----------------------------------------------------------|
| Onset of labor                                                                                         | Spontaneous labor                                               | Number of women with spontaneous labor <sup>2</sup>                                                                                                                                                                                                           | Total number of deliveries <sup>2</sup>                   |
|                                                                                                        | Definition of a planned cesarean delivery                       | Surgical indication of a cesarean recorded ≥48 hours before its performance                                                                                                                                                                                   |                                                           |
|                                                                                                        | Cesareans in primiparas with one previous cesarean <sup>3</sup> | Number of cesareans among primiparas with one previous cesarean <sup>2</sup>                                                                                                                                                                                  | Total number of deliveries among primiparas <sup>2</sup>  |
|                                                                                                        | Adjusted proportion of cesarean deliveries                      | Expected cesarean rate is calculated by adjustment with multivariate statistical methods that take into account women's demographic factors (e.g. age, etc.) and disorders (e.g. hypertension)                                                                |                                                           |
|                                                                                                        | Cesarean deliveries <32 wk                                      | Number of cesareans <32 wk <sup>2</sup>                                                                                                                                                                                                                       | Total number of deliveries <32 wk <sup>2</sup>            |
| Delivery                                                                                               | Unplanned cesareans after Spontaneous onset of labor            | Number of unplanned cesareans after spontaneous labor <sup>2</sup>                                                                                                                                                                                            | Total number of women with spontaneous labor <sup>2</sup> |
|                                                                                                        | Maternity Unit Performance Index                                | The Maternity Unit Performance Index (MUPI) is calculated by assigning a contributor index of +1, +0.5, -1, -0.5 to various positive and negative obstetric performance parameters. Obstetric components of MUPI and their contributor index assignments are: |                                                           |
|                                                                                                        |                                                                 | - vaginal delivery (VD), spontaneous labor (SpL): +1                                                                                                                                                                                                          |                                                           |
|                                                                                                        |                                                                 | - assisted deliveries (AssD), induction of labor (IOL): +0.5                                                                                                                                                                                                  |                                                           |
|                                                                                                        |                                                                 | - cesarean delivery (C/D), elective cesarean delivery (eIC/D): -1                                                                                                                                                                                             |                                                           |
| - 3rd and 4th degree perineal tears (TR): -0.5                                                         |                                                                 |                                                                                                                                                                                                                                                               |                                                           |
| - blood transfusion (BT) required during the first 2 hours postpartum: -0.5                            |                                                                 |                                                                                                                                                                                                                                                               |                                                           |
| - perinatal mortality rate (PMR): -1                                                                   |                                                                 |                                                                                                                                                                                                                                                               |                                                           |
| - maternal mortality rate (MMR): -1.                                                                   |                                                                 |                                                                                                                                                                                                                                                               |                                                           |
| The MUPI formula is the following:                                                                     |                                                                 |                                                                                                                                                                                                                                                               |                                                           |
| MUPI=VD×(+1)+AssD×(+0.5)+C/D×(-1)+SpL×(+1)+IOL×(+0.5)+eIC/D×(-1)+TR×(-0.5)+BT×(-0.5)+PMR×(-1)+MMR×(-1) |                                                                 |                                                                                                                                                                                                                                                               |                                                           |

Supplementary Table S1. *Cont.*

| Category                         | Quality indicators <sup>1</sup> or Definitions                                | Numerator                                                                                                                                                                      | Denominator                                                                                                                 |
|----------------------------------|-------------------------------------------------------------------------------|--------------------------------------------------------------------------------------------------------------------------------------------------------------------------------|-----------------------------------------------------------------------------------------------------------------------------|
| Neonatal morbidity and mortality | Apgar score <5 at 5 min                                                       | Number of live-born infants with Apgar score <5 at 5 min <sup>2</sup>                                                                                                          | Total number of live-born infants (stillborn infants excluded) <sup>2</sup>                                                 |
|                                  | Live-born infants, preterm birth <33 wk                                       | Number of live-born infants with a birth <33 wk <sup>2</sup>                                                                                                                   | Total number of live-born infants <sup>2</sup>                                                                              |
|                                  | Birth weight <5th percentile for gestational age                              | Number of infants with a birth weight <5th percentile for gestational age <sup>2</sup>                                                                                         | Total number of infants <sup>2</sup>                                                                                        |
|                                  | Birth weight <2750 g with birth ≥40 wk                                        | Number of infants with a birth weight <2750 g with a birth ≥40 wk <sup>2</sup>                                                                                                 | Total number of infants with birth ≥40 wk <sup>2</sup>                                                                      |
|                                  | Birth weight <2500 g                                                          | Number of infants with a birth weight <2500 g <sup>2</sup>                                                                                                                     | Total number of infants <sup>2</sup>                                                                                        |
|                                  | Infants discharged from delivery unit with mother and birth ≥37 wk            | Number of live-born infants ≥37 wk discharged from delivery unit with mother <sup>2</sup>                                                                                      | Total number of live-born infants ≥37 wk <sup>2</sup>                                                                       |
|                                  | Neonatal transfers in intensive care unit with birth weight >2500 g           | Number of live-born infants transferred to a neonatal intensive care unit with a birth weight >2500 g <sup>2</sup>                                                             | Total number of live-born infants with birth weight >2500 g (admissions for congenital malformations excluded) <sup>2</sup> |
|                                  | Neonatal transfers to any neonatal units for inborn infants with birth ≥22 wk | Number of infants transferred to any neonatal unit with a birth ≥22 wk <sup>2</sup>                                                                                            | Total number of live-born infants with a birth ≥22 wk (admissions for congenital malformations excluded) <sup>2</sup>       |
|                                  | Uncomplicated births with a healthy child                                     | Total number of births without any of: cesarean or obstetric intervention, postpartum hemorrhage >1000 mL or perineal laceration, and with a 5-min Apgar score ≥9 <sup>2</sup> | Total number of live-born infants <sup>2</sup>                                                                              |
|                                  | Stillbirths ≥28 wk                                                            | Number of fetal deaths (including in utero fetal deaths, medical terminations and intrapartum deaths) born ≥28 wk <sup>2</sup>                                                 | Total number of births ≥28 wk (live-born or stillborn infants) <sup>2</sup>                                                 |

Supplementary Table S1. Cont.

| Category           | Quality indicators <sup>1</sup> or Definitions                              | Numerator                                                                                                                                                                        | Denominator                                                               |
|--------------------|-----------------------------------------------------------------------------|----------------------------------------------------------------------------------------------------------------------------------------------------------------------------------|---------------------------------------------------------------------------|
| Maternal morbidity | Postpartum hemorrhages >500 mL (regardless of mode of delivery)             | Number of postpartum hemorrhages >500 mL <sup>2</sup>                                                                                                                            | Total number of deliveries <sup>2</sup>                                   |
|                    | Postpartum hemorrhages >1500 mL (regardless of mode of delivery)            | Number of deliveries with a postpartum hemorrhages >1500 mL <sup>2</sup>                                                                                                         | Total number of deliveries <sup>2</sup>                                   |
|                    | Postpartum hemorrhages >1500 mL for cesareans                               | Number of postpartum hemorrhages >1500 mL for cesarean <sup>2</sup>                                                                                                              | Total number of cesarean deliveries <sup>2</sup>                          |
|                    | Intact perineum in spontaneous delivery                                     | Number of women with an intact perineum (without suture) in spontaneous delivery <sup>2</sup>                                                                                    | Total number of spontaneous vaginal deliveries <sup>2</sup>               |
|                    | Intact perineum in primiparas                                               | Number of women with an intact perineum (without suture) in primiparas <sup>2</sup>                                                                                              | Total number of deliveries in primiparas <sup>2</sup>                     |
|                    | Perineal lacerations (perineal tears and/or episiotomy)                     | Number of women with perineal lacerations (tears and/or episiotomy) <sup>2</sup>                                                                                                 | Total number of vaginal deliveries <sup>2</sup>                           |
|                    | Perineal lacerations without episiotomy                                     | Number of women with perineal lacerations (tears) without episiotomy <sup>2</sup>                                                                                                | Total number of vaginal deliveries <sup>2</sup>                           |
|                    | First-degree perineal tears                                                 | Number of women with 1st-degree perineal tears <sup>4</sup> for vaginal delivery <sup>2</sup>                                                                                    | Total number of vaginal deliveries <sup>2</sup>                           |
|                    | Second degree perineal tears                                                | Number of women with 2nd-degree perineal tears <sup>5</sup> for vaginal delivery <sup>2</sup>                                                                                    | Total number of vaginal deliveries <sup>2</sup>                           |
|                    | Severe perineal tears in vacuum delivery                                    | Number of women with 3rd- and 4th-degree perineal tears <sup>6</sup> for instrumental vaginal delivery using vacuum <sup>2</sup>                                                 | Total number of instrumental vaginal deliveries using vacuum <sup>2</sup> |
|                    | Adjusted proportion of severe perineal lacerations (third or fourth degree) | Proportion of severe perineal tears (3rd- and 4th-degree) adjusted for maternal age, parity, ethnicity, instrumental extraction, episiotomy, birth weight, and shoulder dystocia |                                                                           |

Wk: weeks of amenorrhea. <sup>1</sup> Quality indicators are expressed as percentages. <sup>2</sup> For births ≥22 wk or birth weight ≥500 g in the absence of a known pregnancy onset. <sup>3</sup> Women with a history of only one child born by cesarean and who have a secondary cesarean for their second delivery. <sup>4</sup> First-degree tears involve damage to vaginal and perineal skin. <sup>5</sup> Second-degree tears involve the posterior vaginal wall and the underlying levator and perineal muscles. <sup>6</sup> Severe perineal tears include 3rd- and 4th-degree perineal tears. Third-degree tears involve the anal sphincter, with either total or partial damage to the sphincter and fourth-degree tears involving the anal sphincter and tears into the rectal mucosa.
